# Supplementary material
Source: publisher site journal article supplement (https://www.dovepress.com/article/319639)
Supplement: Supplementary file 1 [file get_supplementary_file.php]

**Appendix**

**Supplementary Table S1**

| **Table S1. Computed tomography parameters at the participating hospitals.** | | | | | |
| --- | --- | --- | --- | --- | --- |
|  | **NFH** | **SPH** | **YPH** | **ZCPH** | **ZPH** |
| **Scanner** | PB | PB | PB | PB | SSDF |
| **TV (kV)** | 120 | 120 | 120 | 120 | 120 |
| **TC (mA)** | 142 | 250 | 300 | 250 | 160 |
| **RT (s)** | 0.75 | 0.5 | 0.75 | 0.5 | 0.5 |
| **DC (mm)** | 128×0.625 | 64×0.625 | 64×0.625 | 128×0.625 | 64×0.625 |
| **FOV (mm)** | 300×300 | 500×500 | 350×350 | 350×350 | 350×350 |
| **PM** | 512×512 | 1024×1024 | 512×512 | 512×512 | 512×512 |
| **Reconstruction** | FSH (C) | FSH (C) | FSH (C) | FST (B) | FSH (C) |
| **ST (mm)** | 5 | 5 | 2 | 5 | 2/ 5 |
| PB: Philips Brilliance; SSDF: Siemens Somatom Definition Flash; TK: tube voltage; TC: tube current; RT: rotation time; DC: detector collimation; FOV: field of view; PM: pixel matrix; FSH: filter sharp; FST: filter Standard; ST: slice thickness; | | | | | |

**Supplementary Figure S1**


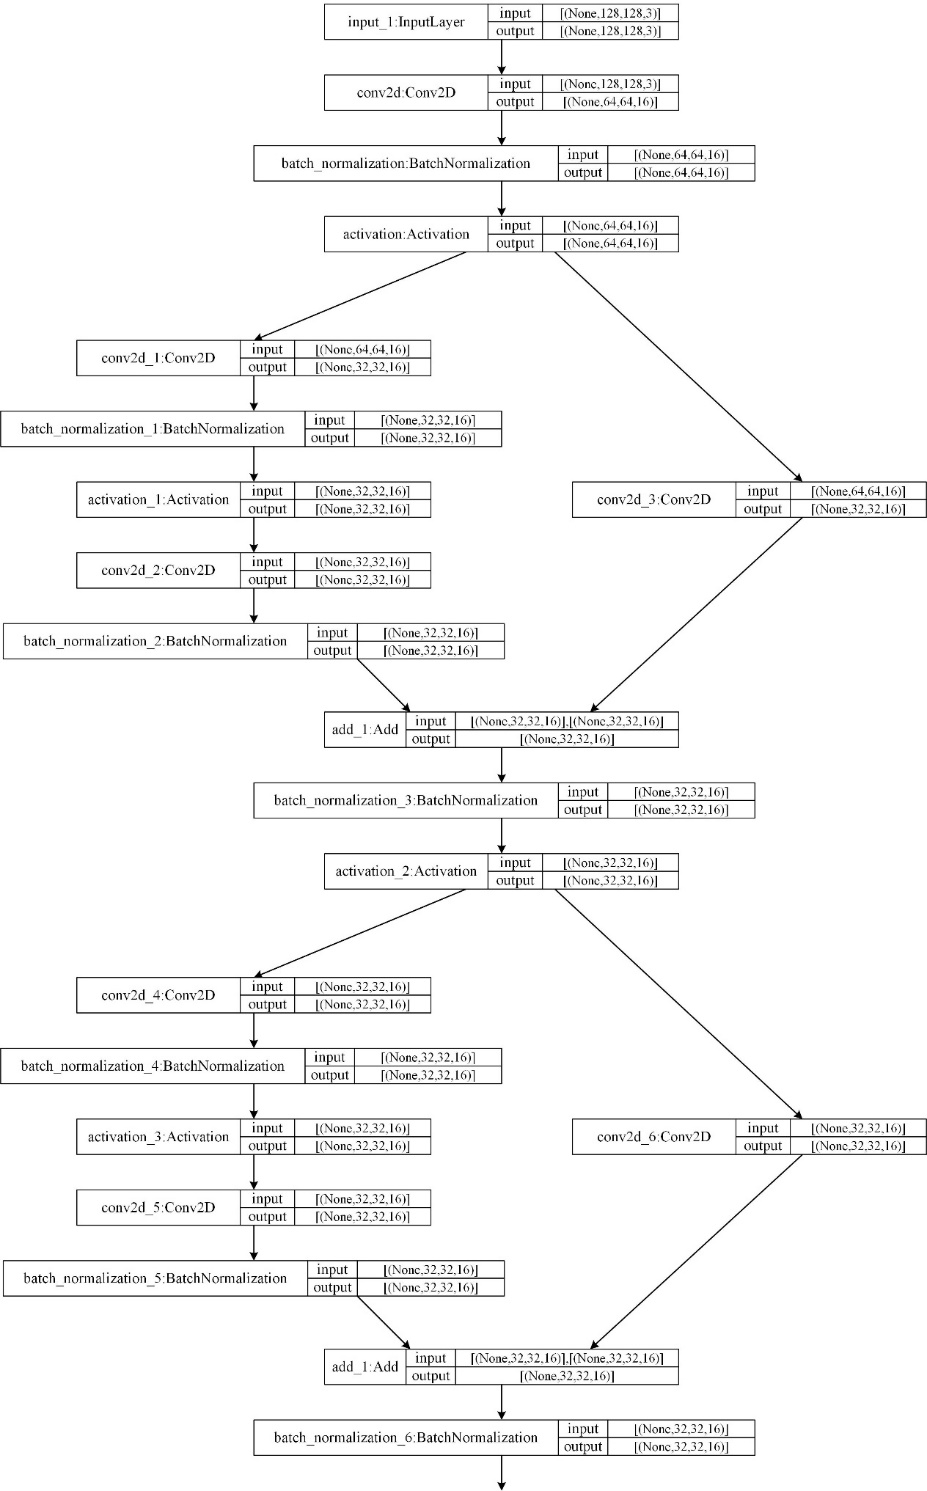


**
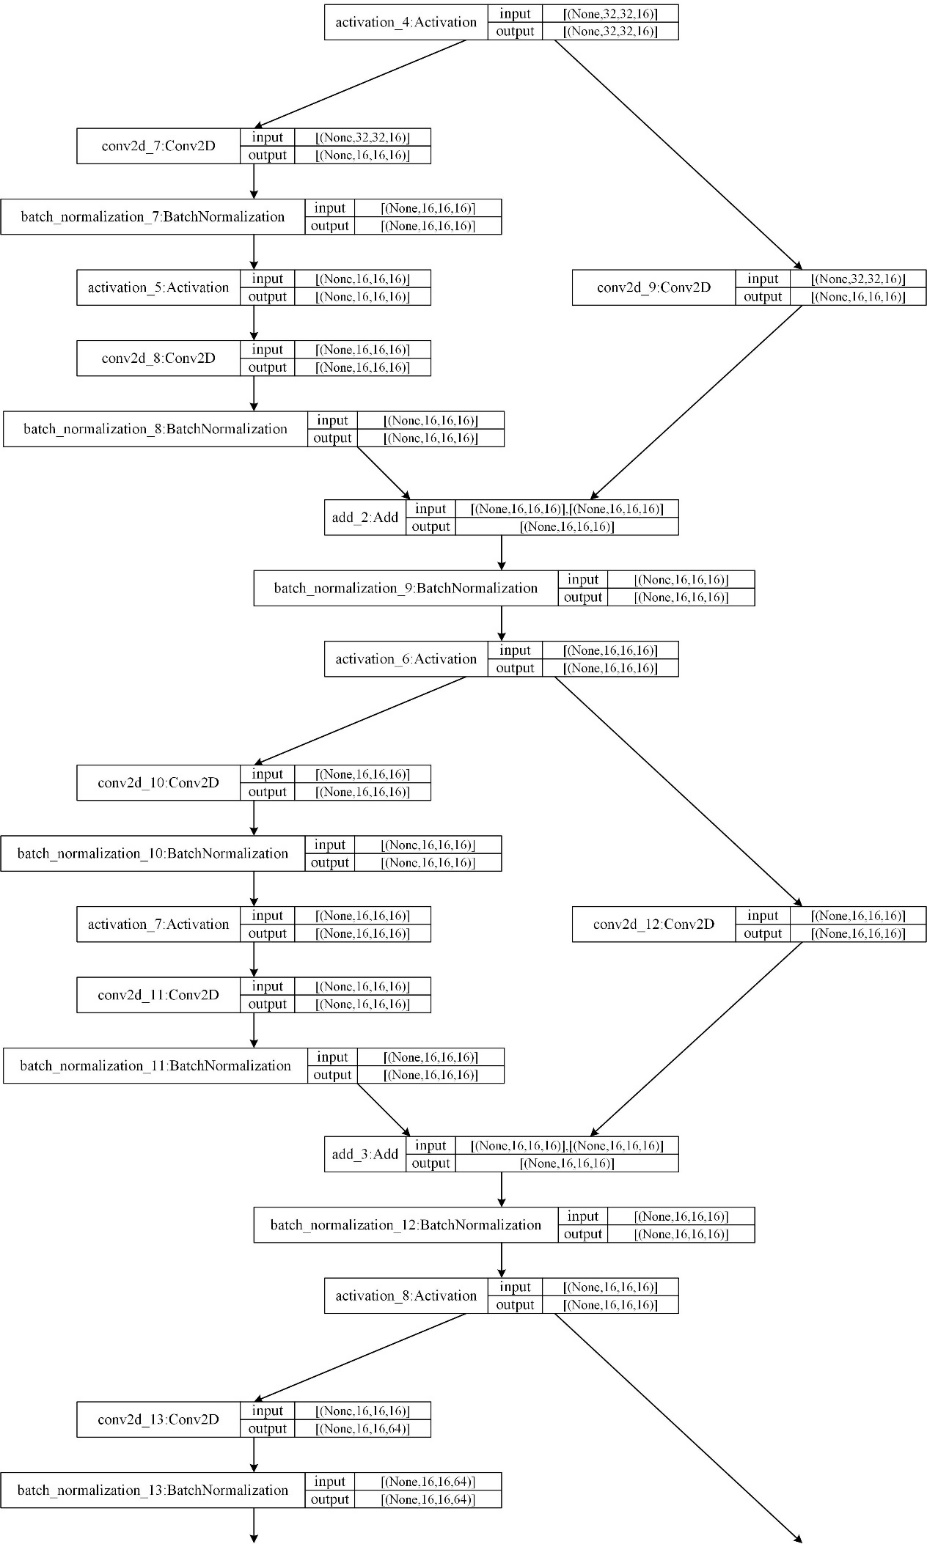
**

**
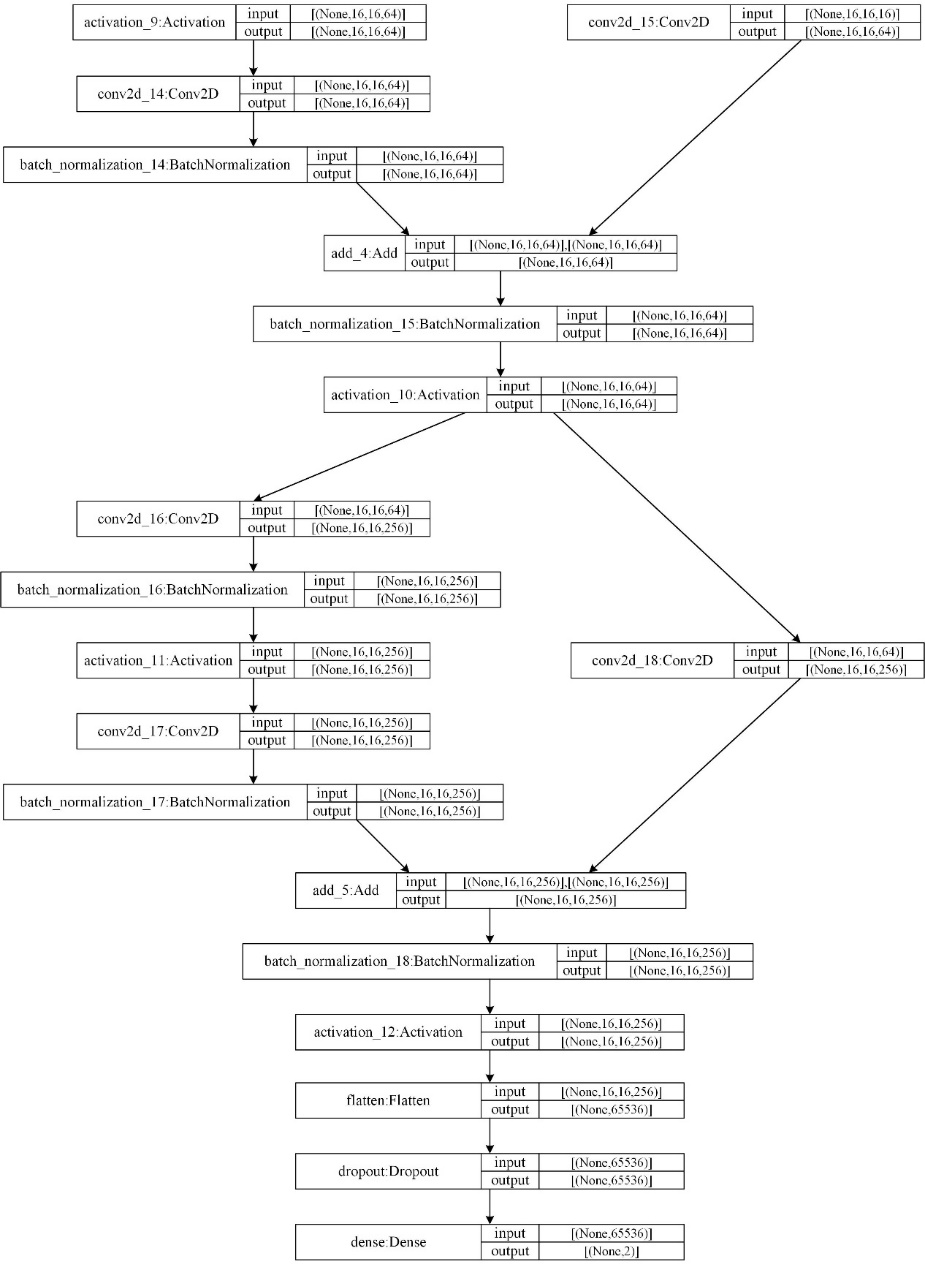
**

**Supplementary Fig S1. Detailed structure of deep learning model for the aggressive-PD prediction**

**Supplementary Figure S2**

**
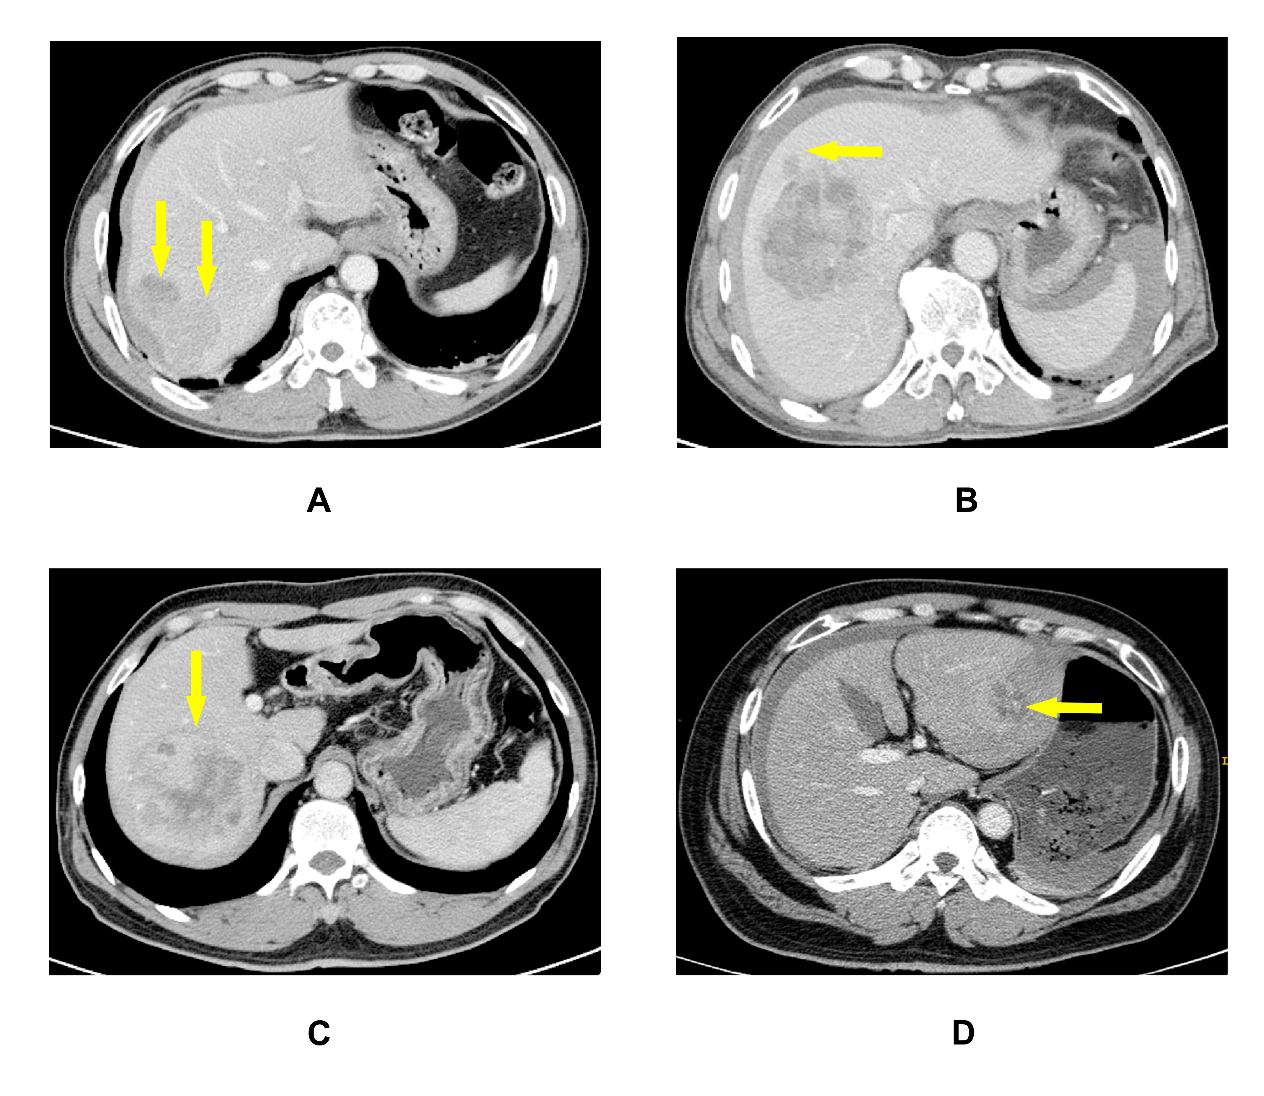
**

**Supplementary Fig S2. Sematic factors used in ModelCS.**

(a) Hepatocellular carcinoma (HCC) with fusion lesions; (b) HCC with non-intact capsule; (c) HCC with intact capsule; and (d) HCC with nodule-in-nodule architecture.

**Supplementary Table S2**

| **Table S2. Univariate logistic regression analysis of clinical and sematic factors** | | |
| --- | --- | --- |
| **Factors** | **OR (95% CI)** | ***p*-value** |
| **Clinical factors** |  |  |
| Sex | 1.010 (0.687–1.483) | 0.962 |
| Age | 0.586 (0.270–1.271) | 0.176 |
| BCLC stage* |  |  |
| 0 |  | Reference |
| A | 0.297 (0.094–0.941) | 0.399 |
| AB | 0.506 (0.242–1.056) | 0.039 |
| B | 0.917(0.482–1.742) | 0.062 |
| Child-Pugh class | 1.817 (0.886–3.723) | 0.103 |
| Treatments | 1.302 (0.738–2.297) | 0.363 |
| HBV | 0.806 (0.221–2.941) | 0.744 |
| AFP (ng/mL, N)* |  |  |
| <25 |  | Reference |
| 25–400 | 0.556 (0.278–1.110) | 0.096 |
| >400 | 1.665 (0.858–3.229) | 0.001 |
| Number of lesions |  |  |
| 1 |  | Reference |
| 2 | 0.818 (0.353–1.898) | 0.640 |
| 3 | 1.455 (0.553–3.828) | 0.448 |
| >3 | 2.000 (0.843–4.747) | 0.116 |
| Maximum diameter* | 2.137 (1.418–3.219) | <0.001 |
| Cirrhosis* | 1.701 (0.976–2.962) | 0.060 |
| Neutrophil-lymphocyte ratio | 1.197 (0.964–1.487) | 0.104 |
| **Sematic factors** |  |  |
| Location | 1.385 (0.716–2.679) | 0.333 |
| Adjacent to liver surface* | 4.079 (0.904–18.405) | 0.067 |
| Fusion lesion* | 3.783 (2.157–6.636) | <0.001 |
| Invasive shape* | 2.883 (1.650–5.037) | <0.001 |
| HCC capsule* |  |  |
| Absent |  | Reference |
| Non-intact | 0.952 (0.473–1.916) | 0.890 |
| Intact | 0.191 (0.076–0.477) | 0.003 |
| HCC capsule breakthrough* | 2.381 (1.178–4.812) | 0.016 |
| Corona enhancement | 1.249 (0.659–2.367) | 0.495 |
| Anti-corona enhancement | 1.791 (0.859–3.733) | 0.120 |
| Mosaic architecture* | 2.530 (1.152–5.554) | 0.021 |
| Nodule-in-nodule architecture* | 3.141 (1.780–5.543) | <0.001 |
| HCC enhancement ratio* |  |  |
| <25% |  | Reference |
| 25–50% | 4.381 (1.703–11.270) | 0.119 |
| 50–75% | 1.910 (0.917–3.978) | 0.345 |
| >75% | 2.683 (1.337–5.384) | 0.002 |
| *Factors with a *p* < 0.100 were included for multivariate regression  AFP: alpha-fetoprotein; BCLC: Barcelona Clinic Liver Cancer; CI: confidence interval; HBV: hepatis B virus; HCC: hepatocellular carcinoma; OR: odds ratio. | | |

**Supplementary Table S3**

| **Table S3. Multivariate logistic regression analysis of clinical and sematic factors** | | |
| --- | --- | --- |
| **Factors** | **OR (95% CI)** | ***p*-value** |
| **Clinical factors** |  |  |
| Maximum diameter | 1.672 (1.003–2.786) | 0.049 |
| Cirrhosis | 2.016 (1.090–3.727) | 0.025 |
| **Sematic factors** |  |  |
| Fusion lesion | 1.710 (0.856–3.414) | 0.128 |
| HCC capsule |  |  |
| Absent |  | Reference |
| Non-intact | 1.643 (0.727–3.715) | 0.233 |
| Intact | 0.298 (0.110–0.805) | 0.004 |
| Nodule-in-nodule architecture | 1.892 (0.910–3.935) | 0.088 |
| CI: confidence interval; HCC: hepatocellular carcinoma; OR: odds ratio. | | |

**Supplementary Table S4**

| **Table S4. Pairwise comparisons between models (*p*-values)** | | | |
| --- | --- | --- | --- |
|  | **NRI** | **IDI** | **Delong test** |
| **Training dataset** |  |  |  |
| ModelCS vs. ModelD | 0.027* | <0.001* | 0.073 |
| ModelCS vs. ModelCSD | 0.002* | <0.001* | <0.001* |
| ModelD vs. ModelCSD | 0.406 | <0.001* | 0.009* |
| **Validation dataset** |  |  |  |
| ModelCS vs. ModelD | 0.047* | 0.056 | 0.501 |
| ModelCS vs. ModelCSD | 0.034* | <0.001* | 0.170 |
| ModelD vs. ModelCSD | 0.708 | 0.008* | 0.384 |
| IDI: integrated discrimination improvement; NRI: net reclassification improvement *Statistically significant differences | | | |

**Supplementary Figure S3**

**
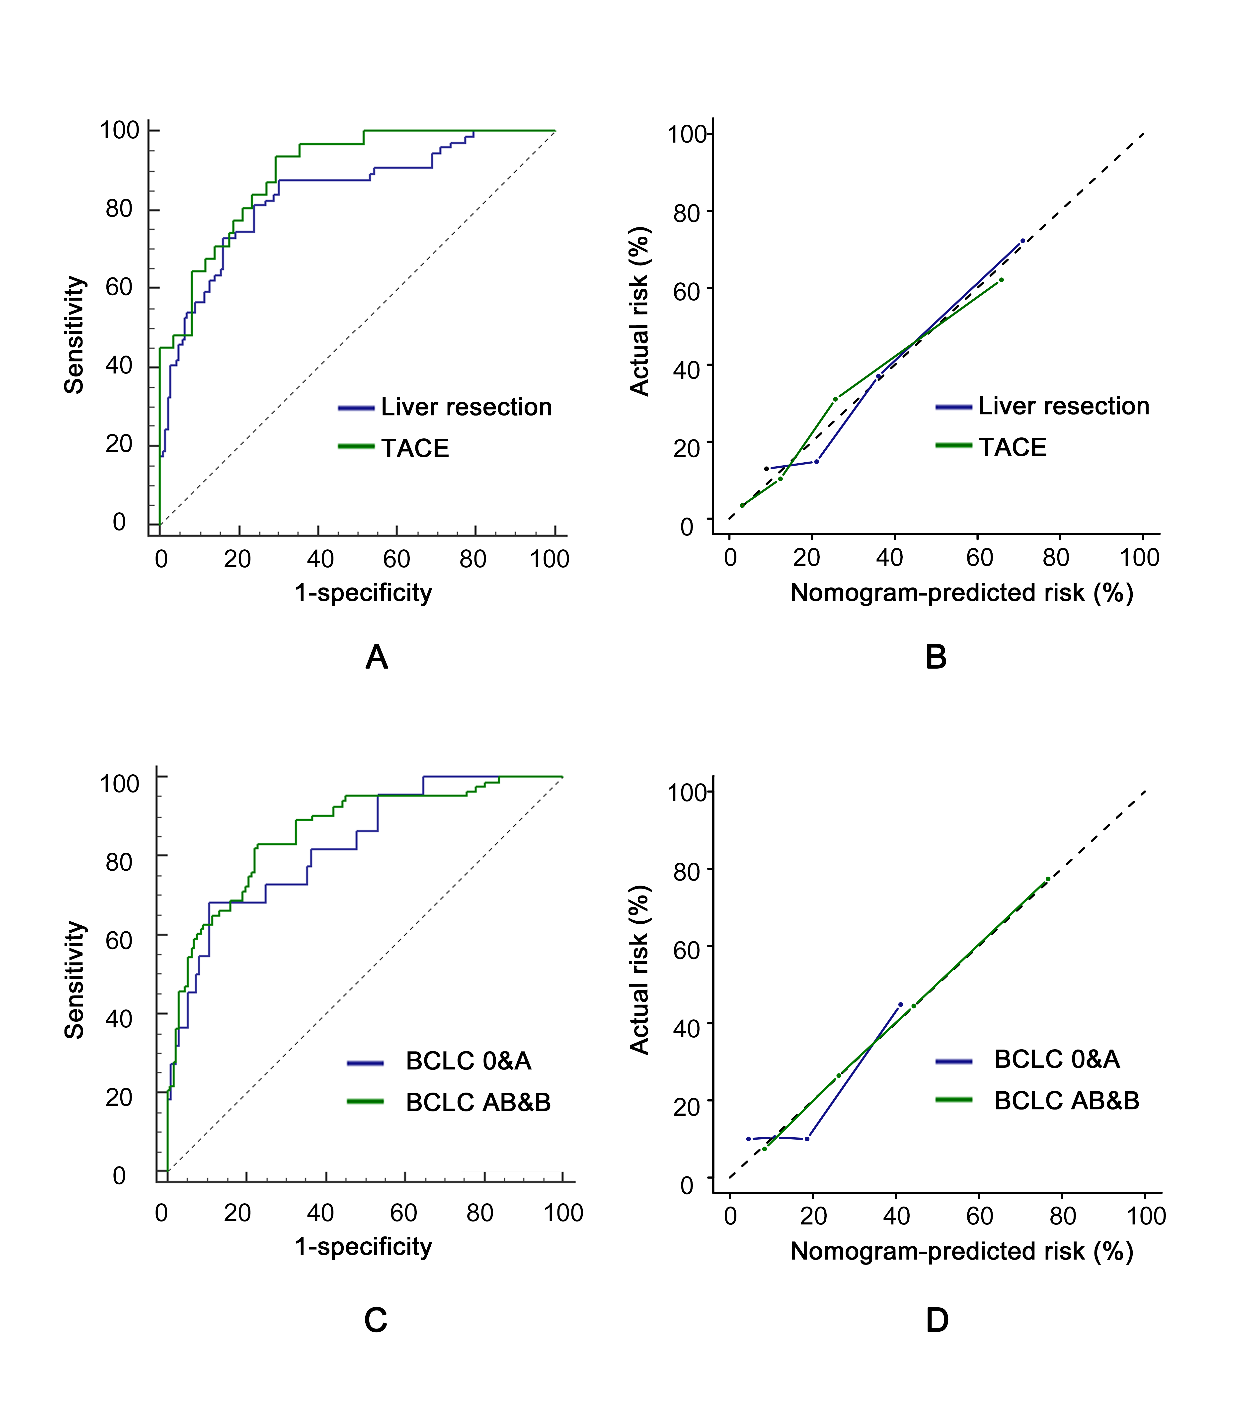
**

**Supplementary Fig S3. Subgroup analysis of ModelCSD.**

The performance ofModelCSD was not influenced by the type of treatment (a and b) or the disease stage (c and d) by AUC and calibration.

**Supplementary Figure S4**


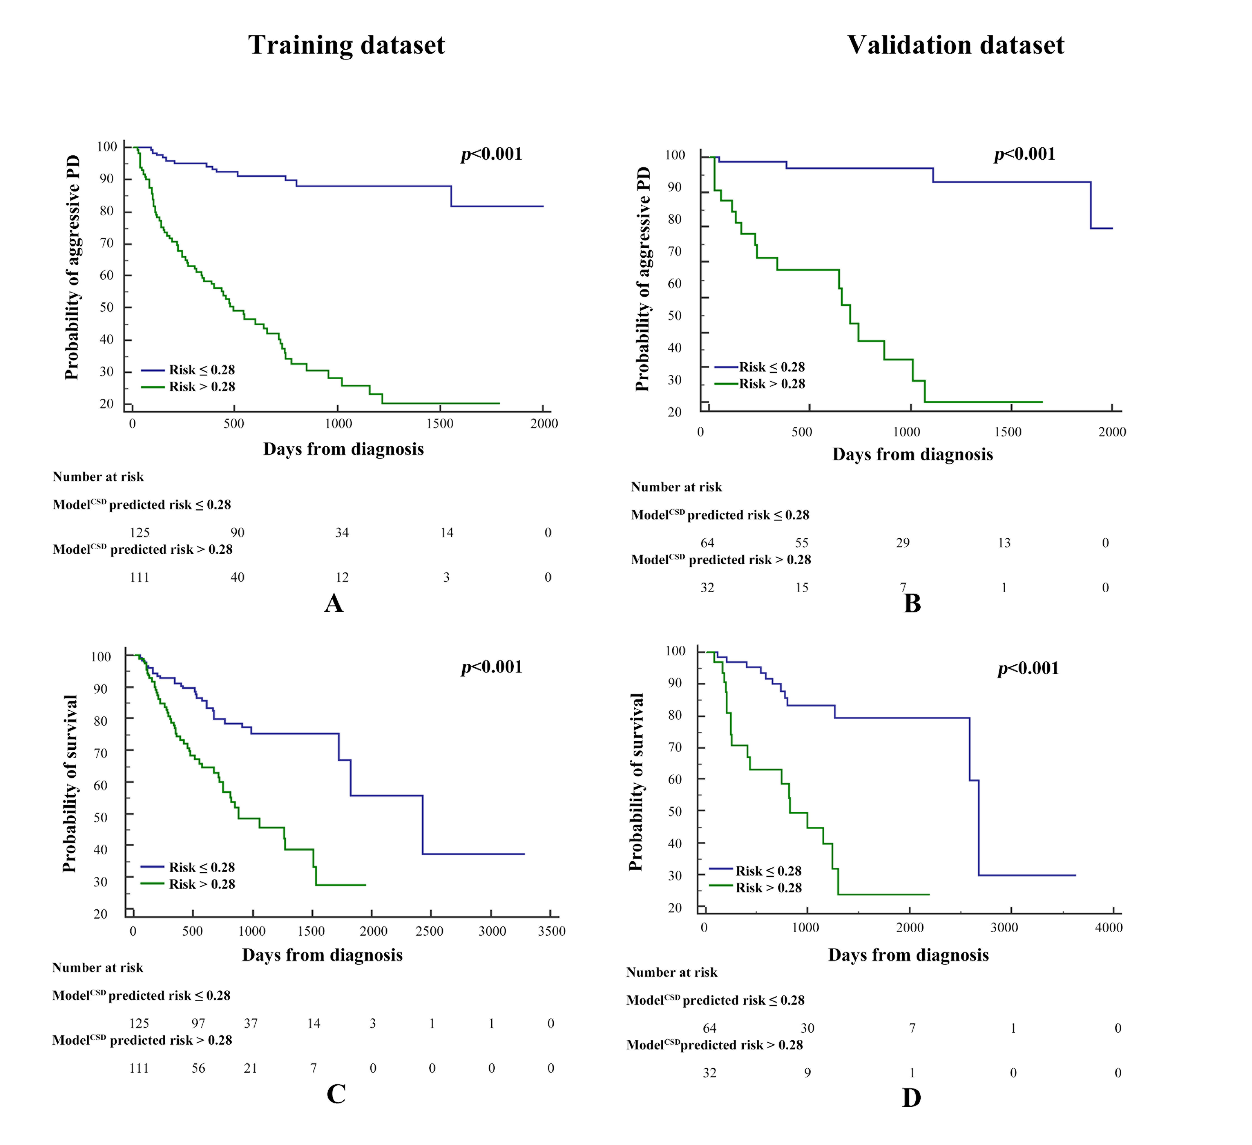


**Supplementary Fig S4. Kaplan-Meier analysis of aggressive PD and overall survival.**

When subdivided by the threshold of ModelCSD predicted risk (0.28), significant differences were observed between the two subgroups in the time to aggressive PD (panels a and b) and overall survival (panels c and c) in both datasets. (Notes: Since only 2 patients had aggressive PD after 2000 days, they were censored at that point with respect to aggressive PD analysis). PD: progressive disease.

**Supplementary Table S5**

| **Table S5. Time to aggressive PD and overall survival between subgroups** | | | | | | |
| --- | --- | --- | --- | --- | --- | --- |
|  | **Training dataset** | | | **Validation dataset** | | |
|  | **Median (days)** | **HR (95% CI)** | ***p*-value** | **Median (days)** | **HR (95% CI)** | ***p*-value** |
| **Time to aggressive PD** |  | 0.108 (0.060–0.197) | <0.001 |  | 0.058 (0.017–0.199) | <0.001 |
| ModelCSD predicted risk ≤0.28 | - |  |  | - |  |  |
| ModelCSD predicted risk >0.28 | 493 |  |  | 744 |  |  |
| **Overall survival** |  | 0.357 (0.223–0.571) | <0.001 |  | 0.204 (0.096–0.436) | <0.001 |
| ModelCSD predicted risk ≤0.28 | 2430 |  |  | 2676 |  |  |
| ModelCSD predicted risk >0.28 | 882 |  |  | 832 |  |  |

HR: hazard ratio; CI: confidence interval; PD: progressive disease.
